# Supplementary material for: Catchment transit time sensitivity to the type of SAS function for unsaturated zone and groundwater
Source: Copernicus journal article supplement (doi:10.5194/egusphere-2025-2597), 2025-07-10
Supplement: Supplementary file [file egusphere-2025-2597-AC1-supplement.pdf]

## Reviewer #1

**Comment:** Thank you for the opportunity to review the manuscript entitled “Catchment transit time sensitivity to the type of SAS function for unsaturated zone and groundwater.” The authors present an interesting study comparing model performance across different setups that vary in the parameters used in the SAS function. This approach aims to deepen the understanding of catchment functioning, specifically the contributions of water from the unsaturated zone and groundwater to catchment transit times in two catchments. Overall, the manuscript addresses an important research gap by challenging an assumption in transit time distribution (TTD) modeling and has the potential to make a valuable contribution. However, I believe that the manuscript in its current form requires major revisions before it can be considered for publication. My main concerns are as follows:

**Response:** We thank Reviewer #1 for the evaluation and positive feedback on our manuscript. Below, we outline how we consider the issues raised by the reviewer and the changes we intend to make. Reviewer comments are shown in black, while our responses are shown in blue.

**Comment:** The language used throughout many sections of the manuscript is often vague and imprecise, which unfortunately leads to several hydrologically inaccurate statements. For example, there is some conflation between residence time distribution and transit time distribution (line 290), the SAS function is described as specifying if rather than how young or old water leaves the storage (line 6), and terms commonly well-defined in hydrology, such as information content (line 10) and “process”, are used incorrectly. A thorough revision of terminology is necessary, particularly in the abstract and introduction, to clarify these points and improve the manuscript’s overall precision.

**Response:** We thank the reviewer for this comment. We will revise the manuscript to improve precision and consistency in terminology and ensure that information content and process are used in accordance with established hydrological terminology throughout the entire manuscript.

For example Line 6 (Abstract): The original text “functions that specify if young or old water leaves a storage” will be revised to: “...functions that specify how young or old water leaves a storage”;

Line 290 (Results): The original text “...influenced the TTD for ages up to 300 day. This was due to the fact that root-zone storage residence time remained predominantly younger than 300 days” will be revised to: “...influenced the transit time distribution (TTD) for ages up to 300 days. This is consistent with the age of the water in root zone storage (i.e., the residence time distribution) being predominately younger than 300 days, and as TTD are part of resident water leaving the system.”

In addition, we will add a brief definition of residence time at its first mention in the manuscript to avoid confusion with transit time: “residence time refers to the duration that water remains in a given storage before leaving it.

**Comment:** The hypotheses as currently formulated are not effectively integrated into the manuscript. First, the connection between the hypotheses and the discussion is missing and could be strengthened by revising the discussion section, which currently has some weaknesses (see one of my later comments). Second, the hypotheses are not formulated in a testable manner, which limits their usefulness in framing the study.

**Response:** We thank the reviewer for this comment. We will revise the formulation of the hypotheses to make them more precise and testable. The revised text will read: “In this study, we hypothesize that preferential release of young water in unsaturated zone and in groundwater contributes measurably to streamflow tracer signal. This effect can be represented through SAS functions, i.e., functions that specify how young or old water leaves a storage, parameterized to favor the release of younger water from storage in catchment-scale transport models”. We further adapted the discussion to address the hypotheses more explicitly.

**Comment:** Although the results section is generally well-written, the key messages are often difficult to discern. A clearer focus and synthesis of the main findings would greatly enhance the manuscript’s impact.

**Response:** We thank the reviewer for this comment. We will revise the Results section to more highlight the key messages by adding short synthesis statements at the end of relevant subsections, ensuring that the main findings are explicitly summarized.

**Comment:** I am uncertain about the comparability of the different model setups as currently presented. The authors rely on common performance metrics such as NSE for comparison, but their stated hypotheses suggest an information theory or information content approach. If the authors choose to maintain the current comparison method, they should provide a more detailed explanation and justification for this choice. NSE also has certain limitations, which should be taken into account in this context.

**Response:** We thank the reviewer for this comment. We will revise the hypotheses to focus on the variability in tracer and streamflow data rather than on an information theory framework. Consistent with this, tracer transport models are generally evaluated based on tracer fit. We therefore assessed model performance using NSE, MAE, and correlation coefficients ( $r$  values), which together capture both variability and error characteristics across scenarios, while each metric also has its limitations. We agree that NSE alone can be misleading, and we will clarify this in the methods while justifying our choice of combining NSE, MAE, and  $r$  as a balanced evaluation approach. In addition, we will highlight in the discussion that weekly-resolution  $\delta^2\text{H}$  measurements can lead to deceptively high NSE values, even when key groundwater age-selection parameters (e.g., preference for young vs. old water) remain poorly constrained. We will add the method section 2.3.1 Model calibration and evaluation:

“Model performance was evaluated using Nash–Sutcliffe Efficiency (NSE), Mean Absolute Error (MAE), and correlation coefficients ( $r$ ). These metrics were selected because they are commonly used in tracer transport modeling and capture different aspects of model fit: NSE emphasizes explained variance, MAE quantifies absolute deviations, and  $r$  assesses correlation structure. While each metric has limitations when considered alone, their combined use provides a more balanced basis for comparing model setups.”

**Comment:** The discussion would benefit from a broader perspective. Addressing questions such as the following could improve the manuscript’s relevance and clarity: What are the key findings for the research community? What are the broader implications of this work? How does this study advance process understanding in other, unstudied catchments? Under what conditions might one expect similar or different results?

**Response:** We thank the reviewer for this suggestion. We will add a subsection on Limitations and Implications in the Discussion to provide a broader perspective. Part of it will be the following text:

“These findings emphasize both the opportunities and limitations of tracer-informed SAS modeling. While our study focused on a lumped catchment-scale framework, the results highlighted the need for advancing toward more distributed models that can more directly link spatial heterogeneity in soils, slopes, and storages to preferential flow dynamics, and for extending such approaches. Catchment scale, isotope-based modeling proved useful in capturing preferential flow in the unsaturated zone but was limited in groundwater due to damping of the seasonal signal of the water stable isotopes by large passive storage volumes assumed through the models. This suggests that in catchments with similarly damped water stable isotope signals, groundwater age selection will be difficult to constrain, whereas in systems with smaller storage, additional tracers or higher-frequency sampling could help to better distinguish groundwater mixing processes and age selection.”

**Comment:** While the authors refer to a previous study for a description of the model setups, I believe the manuscript would benefit from a brief summary of the underlying assumptions and structural details within the current text. This would enhance clarity for readers unfamiliar with the referenced work.

**Response:** We will add a brief summary of the underlying assumptions and structural details of the model to enhance clarity for readers unfamiliar with the referenced work. In addition, we will include the relevant bucket-model equations for the water age balance (currently presented in Türk et al., 2024, Section “Integration of the rSAS function concept and the hydrological model”) and provide a clearer description of how each bucket’s tracer balance is formulated and parameterized through the SAS framework.

**Comment:** Additionally, the configuration used to test passive groundwater storage requires further explanation. In particular, it would be helpful if the authors could elaborate on the rationale for choosing the specific storage volumes and clarify how mixing within this storage compartment was considered.

**Response:** We thank the reviewer for this comment. We will expand the description of the passive groundwater storage setup to clarify both the rationale for the selected volumes and how mixing was implemented. Specifically, we will explain that groundwater was represented as consisting of an active ( $S_{s,a}$ ) and a passive ( $S_{s,p}$ ) storage, where  $S_{s,p}$  mixes isotopically with active storage but does not contribute directly to runoff. The total storage ( $S_{s,tot}$ ) therefore reflects both compartments, influencing the tracer signal of baseflow. We will also clarify that the three passive storage volumes ( $S_{s,p} = 500, 1000, \text{ and } 5000 \text{ mm}$ ) were chosen to cover the range reported in comparable headwater catchments (Birkel et al., 2011; Benettin et al., 2015; Hrachowitz et al., 2021; Wang et al., 2023).

Some specific comments are provided below for consideration.

----

**Comment:** Title “sensitivity”: It is not clear whether the manuscript presents a sensitivity analysis. Please clarify if such an analysis was performed; otherwise, consider revising the title accordingly.

Title “type of SAS function”: Typically, SAS function types refer to, for example, gamma or beta functions. This may not be what you mean here please clarify the intended meaning.

**Response:** We will revise the title to reflect the scope of the study. Since our work compares different SAS parameterizations rather than performing a formal sensitivity analysis, we will replace “sensitivity” with wording that avoids potential misinterpretation. We will also clarify that by “type of SAS function” we refer to parameterizations favoring younger versus older water leaving storage, not to specific functional forms.

**Revised Title:**

“Catchment transit time variability with different SAS function parameterizations for the unsaturated zone and groundwater”

Line 3: The terms fast and short are subjective and relative. Please avoid judgmental terms.

**Response:** We will revise the sentence as to avoid judgmental terms

“facilitate more rapid water and solute transport, leading to quick streamflow responses and comparatively short water transit times.

Line 3: In the phrase “such preferential flow processes,” please clarify which specific processes from the previous statements are meant—do you mean preferential flow paths?

**Response:** We will revise the sentence and replace “such preferential flow processes,” to “preferential flow paths” as:

“While preferential flow paths are well documented in the unsaturated zone and groundwater...”

Line 4: Please clarify the reference of the word “these.”

**Response:** We will remove “these” from the sentence.

Line 5: Use the term significant only where statistical significance (p-value) is reported; otherwise, rephrase.

**Response:** We will remove the term “significant” and rephrase the hypothesis to make it more testable and precise.

Line 5: The statement “...by selecting specific SAS functions” seems self-evident because preferential discharge of young groundwater cannot be represented without selecting an SAS function. Please refine the hypothesis so that it is testable and cannot be answered with a simple “yes.”

We agree with this comment, and we will revise the hypothesis as: “In this study, we hypothesize that preferential release of young water in unsaturated zone and in groundwater contributes measurably to streamflow tracer signal. This effect can be represented through SAS functions, i.e., functions that specify how young or old water leaves a storage, parameterized to favor the release of younger water from storage in catchment-scale transport models”

Line 6: Replace “if” with “how.”

**Response:** We will replace “if” with “how.”

Lines 6–8: It is unclear whether the functions were parameterized or if they were part of different model setups. Please clarify.

**Response:** We agree that the original wording was unclear. We will revise the sentence to explicitly indicate that it was the SAS functions that were parameterized, rather than different model setups. To clarify this, we will revise the sentence to read as follows:

“We systematically compared multiple parameterizations of the StorAge Selection (SAS) functions for the unsaturated zone and groundwater within a catchment-scale transport model using long-term measurements of hydrogen isotopes ( $\delta^2\text{H}$ ) from two headwater catchments (the Hydrological Open Air Laboratory (HOAL) in Austria and the Wüstebach catchment in Germany).”

Line 10: The term “information content” implies the use of information theory; please clarify if that is the case.

**Response:** Thank you for the comment. Our intention was to express that the  $\delta^2\text{H}$  ratios in streamflow exhibited sufficient variability/sensitivity to preferential flow in the unsaturated zone. To clarify this, we will revise the sentence as follows:

“The results indicated that  $\delta^2\text{H}$  ratios in streamflow exhibited significant variability to identify preferential flow in the unsaturated zone. This was supported by Spearman rank correlations ( $r$ ) between simulated and observed  $\delta^2\text{H}$  signals in streamflow, where  $r$  values ranged between 0.58 and  $-0.18$  for HOAL, and between 0.58 and 0.28 for the Wüstebach catchment, reflecting a transition from strong young-water preference to old-water preference across SAS shape parameter values between 0.1 and 5.0.”

Lines 10–18: This section should be improved by clearly stating the main message of the results and explicitly explaining the relationship between age and specific SAS functions.

**Response:** We will revise lines 10–18 to more clearly state the main message of the results and explicitly link the findings to the role of SAS functions. The revised text will read:

“However,  $\delta^2\text{H}$  ratios in streamflow showed limited variability to identify preferential release of young water in groundwater. In the HOAL catchment,  $r$  values ranged only between 0.54 and 0.60, while in the Wüstebach catchment they varied between 0.71 and 0.76 across SAS shape parameter values from 0.1 to 5.0. This limited sensitivity reflected that seasonal variation in  $\delta^2\text{H}$  in pore water was strongly dampened by the catchments’ substantial passive groundwater storage volumes. This was further confirmed as the observed attenuated  $\delta^2\text{H}$  signal in streamflow could only be simulated when the volume ratio between active and passive groundwater storage was  $< 1\%$ , highlighting the dependence of SAS-based age selection on storage configuration. This damping effect, combined with the groundwater SAS function parameterization, influenced the estimation of the longer tails ( $100 < T < 1000$  days) of the transit time distributions, making it difficult to determine the fraction of stream water older than 100 days.”

Line 24: The term “dry period” depends on climatic context; please specify.

**Response:** We agree that the term “dry period” is too general and depends on climatic context. We will revise the sentence to clarify that we refer to low-flow conditions resulting from below-average precipitation and/or reduced soil moisture availability. The revised sentence will read:

“Groundwater plays a crucial role in the hydrological cycle and in sustaining streamflow during low-flow periods, thus regulating the timing and quality of baseflow contributions to streams (van der Velde et al., 2011; Hamilton, 2012; Kaandorp et al., 2018b).”

Line 25: Specify whether “reaching streams” refers to water after precipitation events or baseflow contributions.

**Response:** We will revise the text by replacing “quality of water reaching streams” with “quality of baseflow contributions to streams.”

Lines 28–30: As written, “this variability” (temporal) cannot be caused by spatial factors such as catchment topology. You may mean differences in temporal variability among catchments. Please reframe.

**Response:** We will replace “this variability” with “variation in flow timescales across catchments” for clarity.

Line 33: The word “dramatically” is subjective; please remove.

**Response:** We will remove the word “dramatically” from the sentence.

Line 38: A model, by definition, cannot detect anything: consider alternative terminology. Similarly, “quantify” may not be applicable in this context.

**Response:** We agree that “detect” and “quantify” are not the correct terminology here. We will revise the sentence to: “transport models can meaningfully simulate preferential groundwater flow pathways.”

Lines 40–41: The terms “follow” and “system” are too vague: please specify.

**Response:** We will revise the sentence for clarity. The revised version will read: “Water molecules entering at different locations within a catchment travel along distinct flow paths and exit at different times via streamflow or evaporation (transit time, TT).”

Line 43: Consider using “control volumes, such as catchments” instead of just “a catchment,” since the approach could also be applied to a lysimeter or a stream reach.

**Response:** We will revise the text to read “control volumes, such as catchments”

Line 46: A process cannot be quantified directly from a TTD; the TTD allows you to infer processes. Please check other occurrences where “process” is used in a similar way.

**Response:** We agree that a process cannot be quantified directly from a TTD. We will revise the sentence to clarify:

“Many studies have integrated hydrometeorological data and applied tracer-based modelling, using the transit time distribution (TTD) to infer flow processes and estimate transit times.”

Line 48: Please clarify why “most” applies here.

**Response:** We will remove the word “most.”

Line 49: The message of this sentence is not sufficiently clear. Please rephrase.

**Response:** We will rephrase the sentence for clarity as follows:

“These studies have shown that streamflow typically consists of water from a broad spectrum of ages, with transit time distributions (TTDs) spanning from days to decades, thereby highlighting the importance of both rapid flow pathways and long-term storage in catchments.”

Line 53: Keep terminology consistent. Use either function or model only when referring to different concepts. Here, it should be “SAS function.” Also, note that the SAS function does not directly capture storage heterogeneity; please define precisely.

**Response:** We will revise the sentence to: “The SAS function represents water age dynamics in hydrological systems by defining the relationship between the distribution of ages stored (residence time distribution, RTD) and the ages removed as outflows (transit time distribution, TTD)”

Line 55: Same adjustment as above. Use function instead of model if referring to the SAS function.

**Response:** We will replace “model” with “function” when referring to the SAS function.

Line 57: Consider rephrasing, as it is unsurprising that time-variable TTDs reflect temporal TTD variability.

**Response:** We will revise the sentence to: “Studies have shown that TTDs vary over time and that transport processes can differ under contrasting conditions, such as between wet and dry periods (Benettin et al., 2015b; Harman, 2015; Kaandorp et al., 2018a).”

Lines 59–63: Please re-check whether all cited studies actually applied SAS functions.

**Response:** We will re-check the cited studies and ensure that only those that applied SAS functions are referenced in this context.

Lines 66–67: Please explain more clearly what is meant by “the age composition of groundwater flow to the stream.”

**Response:** We will revise the sentence to: “In many SAS function applications, the age distribution of baseflow (groundwater contribution to streamflow) is simplified by assuming uniform mixing of stored ages.”

Line 69: SAS functions cannot be “measured”; you can parameterize them. Please revise.

**Response:** We will revise the sentence to: “Noting that SAS functions are not straightforward to parameterize.”

Line 79: Specify what the “release of young water” refers to.

**Response:** We will revise the sentence to: “Indeed, increasing evidence suggests that groundwater systems may not be completely mixed, and that the preferential release of relatively young water (recently recharged water) to streams may be a ubiquitous feature of groundwater in heterogeneous aquifers.”

Line 80: Indicate where the “generally low longitudinal and transversal dispersivities” apply.

**Response:** We will revise the sentence to: “... (ii) generally low longitudinal and transversal dispersivities in groundwater systems, leading to little mixing,”

Lines 81–83: This sentence appears disconnected from the previous one; please rephrase for cohesion.

**Response:** We will rephrase the sentence for improved cohesion with the preceding text:



“This evidence suggests that groundwater systems are often not completely mixed and that the preferential release of young water may be common in heterogeneous aquifers. Therefore, SAS functions should be formulated to account for these flow processes and the resulting nonlinearities in groundwater contributions and catchment responses.”

Line 93: Clarify whether “long-term tracer observations” were conducted in streams or in groundwater.

**Response:** We will update the sentence to “long-term tracer observations in streamflow.”

Line 96: The main objective could be presented in a way that connects more clearly to the underlying processes of interest rather than focusing solely on technical aspects.

**Response:** We will revise the objective to more clearly emphasize the underlying hydrological processes of interest. The revised text will read:

“The main objective of this study was to assess how the young water from preferential flow in the unsaturated zone and in groundwater influences catchment-scale transit times and tracer dynamics. Therefore, we evaluated how different parameterizations of SAS functions, which describe the release of younger versus older water from storage, affect simulated tracer signals at the stream outlet. By systematically comparing multiple mixing assumptions, we tested the hypothesis if preferential release of young groundwater contributes measurably to streamflow tracer signal and if it should therefore be represented in catchment-scale transport models. Additionally, we examined how the extent and mixing of passive groundwater storage modulate tracer signals and shape the tails of the estimated transit time distributions.”

Line 103: If the term “information content” is used, ensure that it is correct. If information theory was not applied, please rephrase.

**Response:** We will replace “information content” with “variability” to avoid misinterpretation.

Line 107: Please define what is meant by “interpretation” in this context.

**Response:** We will clarify the wording by replacing “interpretation” with a more precise term like “the ability to reproduce”.

“Does explicitly accounting for the preferential release of young water in groundwater, through a SAS function, affect catchment-scale transit time distributions and simulated tracer signals in streamflow?”

Line 108: Clarify the meaning of “representation of preferential groundwater flow.”

**Response:** We will revise the research question to avoid the vague term “representation” and to more clearly link passive storage and mixing assumptions to model outcomes. The revised question will read:

“How do different groundwater mixing assumptions, in combination with varying passive storage volumes, affect the model’s ability to reproduce streamflow  $\delta^2\text{H}$  signals, model performance, and the inferred transit time distributions at the catchment scale?”

Line 122: Please state in which catchment the “predominant soil types” are found.

**Response:** We will clarify this by specifying that the predominant soil types are found in the HOAL catchment.

Line 135: The term “catchment flow” is not defined. Do you mean streamflow?

**Response:** Yes, we mean streamflow, and we will revise the text accordingly.

Line 160: It is important to briefly explain the underlying assumptions and general model setup, even if they are covered in a previous publication. Currently, it is unclear how the SAS functions are integrated into the model.

**Response:** We thank the reviewer for this comment. We will revise the sentence as follows to explain the underlying assumptions:

“To route  $\delta^2\text{H}$  fluxes through the model, we integrated the storage-age selection (SAS) approach (Rinaldo et al., 2015; Harman, 2015) into the hydrological model. In this framework, each storage is represented as a ranked distribution of water ages, and outflow is sampled from this distribution according to an age-dependent selection function. This allows the model to reproduce different mixing behaviors by allowing either younger or older water leaving storage, depending on the SAS function parameterization.”

We will add the relevant bucket-model equations for the water age balance that are described in Türk et al. (2024), Section “Integration of the rSAS function concept and the hydrological model”. In addition, we will provide a clearer description of how each bucket’s tracer balance is formulated and parameterized through the SAS framework.

Lines 178–184: The SAS function is generally time-variable. Please clarify the novelty of the approach described. Explain why the precipitation value was set as it was and define  $S_{r,\max}$ .

**Response:** We will clarify that the dual dependence of  $\alpha(t)$  on both soil moisture and precipitation intensity extends previous SAS applications by providing a more flexible representation of unsaturated zone preferential flows in the HOAL catchment. We will also define  $S_{r,\max}$  explicitly as the calibrated maximum root-zone storage capacity, which controls the scaling of relative soil wetness in the  $\alpha(t)$  formulation. The precipitation threshold value ( $P_{\text{thresh}}$ ) will be clarified as a calibration parameter representing the intensity above which infiltration excess preferential flow pathways are activated.

We will revise the section as:

“In the HOAL catchment, previous studies highlighted the non-linearity of preferential flow generation, where both precipitation intensity and soil moisture influence the activation of preferential flow pathways (Türk et al., 2024; Széles et al., 2020). To represent this behavior, we parameterized the SAS function for preferential flow from the unsaturated root zone ( $R_f$ , Fig. S 1) with a time-variable shape parameter  $\alpha(t)$ . Specifically,  $\alpha(t)$  varied as a function of relative soil moisture (scaled by the maximum root-zone storage capacity,  $S_{r,\max}$ ) and precipitation intensity ( $PI$ ,  $\text{mm d}^{-1}$ ), with a threshold parameter ( $P_{\text{pres}}$ ) controlling the onset of precipitation-driven preferential flow. This formulation allows the model to capture the observed interplay between soil wetness and rainfall events in activating preferential flow. The dual dependence of  $\alpha(t)$  on soil moisture and precipitation intensity extends previous SAS applications by providing a more flexible representation of unsaturated zone preferential flow dynamics in HOAL.”

Lines 195–199: Please explain why streamflow, log streamflow, flow duration curve, runoff coefficient, and  $\delta^2\text{H}$  were selected as variables.

**Response:** We will revise the text to clarify the rationale for selecting these performance metrics. Specifically, the original sentence will be revised as follows:

“For model parameter optimization, we used the Differential Evolution algorithm (Storn and Price, 1997) and an objective function that combined five performance criteria related to streamflow and  $\delta^2\text{H}$  dynamics. The objective function included the Nash-Sutcliffe efficiencies (NSE) of streamflow (to evaluate overall discharge dynamics), logarithmic streamflow (to match low-flow conditions), the flow duration curve (to capture the distribution of flows over time), the runoff coefficient averaged over three months (to ensure water balance consistency), and the NSE of the  $\delta^2\text{H}$  signal in streamflow (to constrain tracer dynamics) (Table S2). These individual performance metrics were aggregated into the Euclidean distance DE, with equal weights assigned to streamflow and the  $\delta^2\text{H}$  signature, according to:”

Line 199: Avoid subjective terms such as “perfect.”



**Response:** We will remove the term “perfect” from the sentence

Line 203: Clarify what is meant by “each combination.”

**Response:** We will remove the term “each combination” from the sentence for clarity.

Line 211: The need for stepwise calibration and the exact order of steps should be made explicit.

**Response:** To clarify, we did not apply a stepwise calibration but instead used one calibration of the hydrological parameters. The stepwise analysis was then performed afterwards by varying the SAS function parameters ( $\alpha_0$  for the unsaturated root zone and  $\alpha$  for the groundwater compartments) while keeping the calibrated hydrological parameters fixed. We will revise the text accordingly to avoid confusion.

Lines 218–221: This information may be better placed earlier in the manuscript for clarity.

**Response:** We will move this information earlier in the manuscript to improve clarity.

Lines 228–237: This section should more clearly describe how different passive storage volumes were implemented in the earlier-described model setup and why these volumes were selected. As it stands, the model configuration is not fully reproducible.

**Response:** We thank the reviewer for this comment. We will revise the section to include the following clarification:

“In the model setup, groundwater storage was formulated as consisting of an ‘active’ groundwater storage ( $S_{s,a}$ ) and a hydrologically ‘passive’ storage volume ( $S_{s,p}$ , mm). The passive storage does not change over time if there are no deep infiltration losses (Zuber, 1986; Hrachowitz et al., 2016; Wang et al., 2023). While  $S_{s,p}$  does not contribute directly to runoff, it isotopically mixes with water in the active storage, thereby influencing the tracer signal of the outflow. The total groundwater storage ( $S_{s,tot}$ ) was therefore considered as the sum of  $S_{s,a}$  and  $S_{s,p}$ , so that the age-ranked groundwater storage ( $S_{T,S,tot}$ ) inherently reflected a mixture of these storage volumes to baseflow ( $Q_s$ , Fig S1) age composition.”

We will also justify the choice of passive storage volumes as follows:

“Each of these mixing scenarios was applied to three different passive storage volumes ( $S_{s,p}$  = 500 mm, 1000 mm, and 5000 mm), which were chosen to cover a ranges reported in comparable headwater catchments (Birkel et al., 2011; Benettin et al., 2015; Hrachowitz et al., 2021; Wang et al., 2023).”

Lines 240–246: Please summarize the key takeaway for the reader.

**Response:** We will add a summary sentence at the end of the section to highlight the main message:

“ $\delta^2H$  in precipitation showed large variability in both catchments, but this signal was damped in streamflow. In HOAL, event-based streamflow  $\delta^2H$  samples reflected how precipitation inputs were transmitted to the stream, whereas weekly samples alone would have masked this variability. In contrast, only weekly streamflow  $\delta^2H$  measurements were available in Wüstebach, resulting in stable values with small variations. This highlights the importance of event-based sampling for detecting preferential flow signals, which may remain obscured with weekly data alone.”

Line 248: Define what is meant by “feasible parameter solutions.”

**Response:** We thank the reviewer for this comment. We will revise the sentence to clarify that it meant parameter solutions with acceptable model performance ( $DE < 1$ ):

“Model calibration resulted in 55 feasible parameter solutions ( $DE < 1$ , indicating acceptable model performance; Fig. S2) for HOAL and 190 feasible parameter solutions for Wüstebach.”

Lines 266–276: Clarify whether these results relate to the stepwise analysis, and connect them to Figure 4. The calculated fractions shown in Figure 4 should also be introduced earlier.

**Response:** We will clarify that these results are not related to the stepwise analysis but are based on the initial model calibration performed prior to the stepwise experiments. We will also introduce the calculated fractions earlier in the text and clearly link them to Figure 4. In addition, we will revise the Methods section to explicitly describe how these fractions were calculated to ensure clarity and reproducibility.

Line 290: The explanation (“This was due to...”) belongs to the Discussion. Also, confirm whether “residence time” here should be “transit time,” and note that this is the first mention of the term in the manuscript.

**Response:** We will revise the sentence accordingly by removing the explanation and rephrasing it as:

“This is consistent with root-zone storage residence times being predominantly shorter than 300 days.”

In addition, we will add a definition of residence time at its first mention to ensure clarity for the reader.

Line 313: Remove the subjective phrase “and somewhat surprisingly.”

**Response:** We will remove the phrase “and somewhat surprisingly” from the sentence.

Line 315: Specify which variability is being reduced—e.g., variability in streamflow?

**Response:** We will revise the sentence to clarify that it refers to variability in the  $\delta^2\text{H}$  signal in streamflow.

Lines 351–354: Consistency with previous findings does not necessarily justify the model configurations or research hypotheses; identical results can occur in the presence of shared erroneous assumptions. Please refine this reasoning.

**Response:** We will refine the reasoning to emphasize that consistency with previous studies provides support but not proof of correctness. The revised text will read:

“The consistency of our results with prior tracer-based modeling and SAS applications in both HOAL (Széles et al., 2020; Türk et al., 2024) and Wüstebach (Stockinger et al., 2019; Hrachowitz et al., 2021) provides additional confidence in the applied model configurations. However, we acknowledge that such consistency alone cannot exclude the possibility of shared structural assumptions. Therefore, we use these results as supporting evidence that the model setups are reasonable for testing the research hypotheses, while recognizing the need for further validation with complementary data and approaches.”

Lines 357–364: Please state clearly what the novelty of this section is.

**Response:** We will revise the text to highlight the novelty of this section by adding the following sentence at the end:

“The novelty of this analysis is that it provides the first systematic demonstration that stable isotope data can constrain SAS parameterizations of root-zone preferential flow in these two contrasting catchments.”

Line 369: Clarify whether the described crust formation was observed directly, or if it is inferred.

**Response:** We will revise the sentence to clarify that the crust formation was observed:

“During the dry summer months, cracks often form in the soil..”

Line 373: Make the link to the previous sentence explicit.

**Response:** We will rephrase the sentence to make the connection explicit:

“These contrasting site characteristics led to consistent findings though, as results from both catchments aligned with previous findings documenting the importance of macropores and preferential flow pathways in the unsaturated zone.”

Line 376: Clarify who assumes this.

**Response:** We thank the reviewer for this comment. We will revise the sentence to avoid the ambiguous term “assume”. The revised text will read:

“These results underline the need to calibrate root-zone SAS parameters when estimating transit times, as the tracer signal showed sensitivity to the SAS function, implying that these parameters can be calibrated.”

Lines 419–444: There is considerable repetition of the results in this section. Consider condensing.

**Response:** We agree with this comment and will condense the section accordingly

#### **References:**

Asadollahi, M., Stumpp, C., Rinaldo, A., and Benettin, P.: Transport and water age dynamics in soils: A comparative study of spatially integrated and spatially explicit models, *Water Resour. Res.*, 56 e2019WR025539, <https://doi.org/10.1029/2019WR025539>, 2020.

Birkel, C., Soulsby, C., and Tetzlaff, D.: Modelling catchment-scale water storage dynamics: Reconciling dynamic storage with tracer inferred passive storage, *Hydrological Processes*, 25, 3924–3936, <https://doi.org/10.1002/hyp.8201>, 2011

Benettin, P., Kirchner, J., Rinaldo, A., and Botter, G.: Modeling chloride transport using travel time distributions at Plynlimon, Wales, *Water Resources Research*, 51, 3259–3276, <https://doi.org/10.1002/2014WR016600>, 2015

Wang, S., Hrachowitz, M., Schoups, G., and Stumpp, C.: Stable water isotopes and tritium tracers tell the same tale: no evidence for underestimation of catchment transit times inferred by stable isotopes in StorAge Selection (SAS)-function models, *Hydrology and Earth System Sciences*, 27, 3083–3114, 2023.
